# Supplementary material for: Comparison of carbon footprint and water scarcity footprint of milk protein produced by cellular agriculture and the dairy industry
Source: Springer Nature journal article supplement (doi:10.1007/s11367-022-02087-0), 2022-08-01
Supplement: MOESM1 [file 23406002]

## Supplementary information

# Comparison of carbon footprint and water scarcity footprint of milk protein produced by cellular agriculture and the dairy industry

The International Journal of Life Cycle Assessment

Katri Behm<sup>1\*</sup>, Marja Nappa<sup>1</sup>, Nina Aro<sup>1</sup>, Alan Welman<sup>2</sup>, Stewart Ledgard<sup>3</sup>, Marjut Suomalainen<sup>1</sup>, Jeremy Hill<sup>2,4</sup>

<sup>1</sup>VTT Technical Research Centre of Finland, Espoo, Finland

<sup>2</sup>Fonterra Research and Development Centre, Palmerston North, New Zealand

<sup>3</sup>AgResearch Ruakura Research Centre, Hamilton, New Zealand

<sup>4</sup>Riddet Institute, Massey University, Palmerston North, New Zealand

\* Corresponding author. E-mail address: [katri.behm@vtt.fi](mailto:katri.behm@vtt.fi) (Katri Behm)

## **DATA 1 Additional process description details for mass and energy balance calculations**

In **microfiltration**, the 0.2  $\mu\text{m}$  pore size was chosen to ensure 100% fungus biomass rejection (sterile filtration). The recovery of the permeate was assumed to be 97.5%, and the target protein was assumed to be dissolved in solution, passing through the membrane. The estimation of electricity demand for microfiltration was 2 kWh/m<sup>3</sup> permeate (Hermann and Patel 2007).

The aim of **combined ultra- and diafiltration** was to concentrate the solution and remove residual impurities. A polyethersulfone (PES) membrane with a molecular weight cut-off (MWCO) of 10 kDa was chosen for both ultrafiltration and diafiltration. In mass balance calculations, 100% retention of proteins through the membrane and permeability of 85% for both water and impurities were assumed for the membrane performance. The operation mode for diafiltration was a continuous cross-current operation. The diavolume (the volume of diafiltration buffer introduced into the unit operation compared to the retentate volume) of 5 m<sup>3</sup> buffer solution/m<sup>3</sup> retentate was estimated to decrease the concentration of the impurities derived from bioreactor cultivation to a suitable level (EMD\_Millipore 2013). The removal efficiency of impurities was roughly estimated by using the equation presented in (Millipore 2003). The estimation of electricity demand for ultra- and diafiltration was 19.7 kWh/m<sup>3</sup> (Cheryan 1998).

Protein was dried using a **spray drier** to a dry matter content of 95%. The estimate for heat demand was 4.9 GJ/tonne of evaporated water, and the estimate for electricity consumption was based on a heat to electricity consumption ratio of 26.9 (Baker and McKenzie 2005).

The performance of an industrial scale **chromatographic separation** of beta-lactoglobulin based on a simulated moving bed (SMB) unit system was estimated based on the available published data. No experimental data was available. In the chromatographic separation unit, the aim was to increase the concentration of the target protein to 95% (mass basis). The resin and chemicals required for the chromatographic separation depend on the proteins' characteristics. The target protein beta-lactoglobulin has a molecular mass of approximately 18 kg/mol, and the pH at its isoelectric point is pH 5.2 (Andersson and Mattiasson 2006). The contaminating proteins in the solution are not defined in the model. As the pH of the target protein's isoelectric point is below 7, anion exchange media is typically used in chromatographic separation. The buffer solution and other chemicals have been chosen based on (Ng and Snyder 2013), who reported chromatographic separation of beta-lactoglobulin from whey. Chemicals for chromatographic separation included a 0.02 mol/l sodium phosphate buffer solution (at pH 6.4) for equilibration and washing, a buffer solution including a varying concentration of sodium chloride for the elution of proteins and regeneration, and sodium hydroxide for final regeneration. The consumption of chemicals depends on the proteins being separated, the resin media utilized in the chromatograph, and the separation technology chosen. The chosen separation technology—simulated moving bed (SMB) technology—decreases the consumption of chemicals and buffer solution compared to conventional industrial-scale batch chromatographic separation (Andersson and Mattiasson 2006).

In this study, the consumption of chemicals per target protein and the volume of process water per target protein (kg chemical/target protein, dm<sup>3</sup> process water/kg target protein, Table 1) were estimated based on the data from Andersson and Mattiasson (2006), who reported the operation and performance parameters for separating lactoperoxidase and

lactoferrin from whey protein concentrate by SMB and compared the results for conventional batch chromatographic separation. Although the separated protein is not the same, the data was used for two reasons. First, the mass balances over the SMB are coarse estimates because the side proteins were not known, and detailed data was not available from either SMB or batch chromatographic separations. Secondly, the chemicals and buffer solution utilized were the same in Andersson and Mattiasson (2006) and Ng and Snyder (2013) for separation for beta-lactoglobulin. The recovery of target protein was assumed to be 98%, based on Andersson and Mattiasson (2006). The estimation of electricity demand for the SMB system (0.05 kWh/m<sup>3</sup>) was based on assumption of 1 bar pressure drop in a column, which according to Thang et al (2005) is a typical approximation for industrial chromatograph columns. Recycling of the chemicals was not considered in this study. However, at scale production, this practice would reduce waste streams and improve the environmental performance of DSP.

**Table 1** Chemical and process water consumption in the SMB system

| Chemical/process water                                      | unit                               | Amount | Reference                      |
|-------------------------------------------------------------|------------------------------------|--------|--------------------------------|
| Sodium hydroxide, NaOH (dry)                                | kg/kg target protein               | 0.3    | Fonterra estimate              |
| Sodium chloride, NaCl (dry)                                 | kg/kg target protein               | 2.4    | Andersson and Matiasson (2006) |
| Sodium phosphate, Na <sub>2</sub> HPO <sub>4</sub> (dry)    | kg/kg target protein               | 0.05   | Andersson and Matiasson (2006) |
| Trisodium phosphate, NaH <sub>2</sub> PO <sub>4</sub> (dry) | kg/kg target protein               | 0.24   | Andersson and Matiasson (2006) |
| Process water                                               | dm <sup>3</sup> /kg target protein | 145    | Andersson and Matiasson (2006) |

**A diafiltration unit was required after the SMB** unit to decrease the concentration of chemicals remaining in the product solution after the chromatographic separation. A similar diafiltration unit was considered as before the SMB: the same membrane was assumed, and the same performance parameters were utilized in the calculation, except for the diavolume. The diavolume of 7 m<sup>3</sup> buffer solution/m<sup>3</sup> retentate was estimated to decrease the concentration of the salt impurities derived from the SMB to a suitable level (EMD\_Millipore 2013).

## References (DATA 1)

Andersson J, Mattiasson B (2006) Simulated moving bed technology with a simplified approach for protein purification: Separation of lactoperoxidase and lactoferrin from whey protein concentrate. *Journal of Chromatography A* 1107:88–95. <https://doi.org/10.1016/J.CHROMA.2005.12.018>

Baker CGJ, McKenzie KA (2005) Energy consumption of industrial spray dryers. *Drying Technology* 23:365–386. <https://doi.org/10.1081/DRT-200047665>

Cheryan Munir (1998) *Ultrafiltration and microfiltration handbook*, 2nd ed. CRC Press.

EMD\_Millipore (2013) *A Hands-On Guide to Ultrafiltration/ Diafiltration Optimization using Pellicon Cassettes*, Application note. [https://businessdocbox.com/Green\\_Solutions/74741348-A-hands-on-guide-to-ultrafiltration-diafiltration-optimization-using-pellicon-cassettes.html](https://businessdocbox.com/Green_Solutions/74741348-A-hands-on-guide-to-ultrafiltration-diafiltration-optimization-using-pellicon-cassettes.html). Accessed 17 Dec 2021.

Hermann BG, Patel M (2007) Today's and tomorrow's bio-based bulk chemicals from white biotechnology: A techno-economic analysis. *Applied Biochemistry and Biotechnology* 136:361–388. <https://doi.org/10.1007/s12010-007-9031-9>

Millipore (2003) Protein Concentration and Diafiltration by Tangential Flow Filtration, Technical brief. [https://biolink.org/home2/sites/files/tff\\_technical\\_brief.pdf](https://biolink.org/home2/sites/files/tff_technical_brief.pdf). Accessed 17 Dec 2021

Ng PK, Snyder MA (2013) Purification of  $\beta$ -lactoglobulin with a high-capacity anion exchanger: High-throughput process development and scale-up considerations. *Journal of the Science of Food and Agriculture* 93:3231–3236. <https://doi.org/10.1002/jsfa.6162>

Thang VH, Koschuh W, Novalin S (2005) Electrodialysis versus chromatography for desalting silage juice: Comparison of both processes with regard to energy consumption. *Journal of Membrane Science* 256:78–88. <https://doi.org/10.1016/j.memsci.2005.01.044>

## Data 2 Additional information about the datasets and factors used in the calculations

The datasets used in the calculations are divided into 9 life cycle steps in the reporting. These are carbon source, nitrogen source, other materials, process water, electricity, thermal energy, transportation, waste treatment, and avoided feed production. The ecoinvent database 3.7.1 (with the cut-off system model) is used as the source for the LCI datasets. The types of AWaRe factors used in each reporting category are shown in Table 2, while the datasets used in each reporting category and different locations are shown in Table 2. Finally, the collected AWaRe factors to represent an average value for the Queensland coastline in Australia, Victoria coastline/Melbourne area, and Alabama and Louisiana in United States (US) are shown in Table 4–Table 7 and Fig. 1-Fig. 4, respectively. It should be noted that the geographical areas of AWaRe factors are not equal between different FIDs, and the deviations may be large within the total area considered.

**Table 2** Types of AWaRe factors used in each reporting life cycle step

|                         |                                                                                           |
|-------------------------|-------------------------------------------------------------------------------------------|
| Carbon source           | Sugar production location, agri<br>For corn steep solids: sugar production location agri, |
| Nitrogen source         | for ammonia, plant location non-agri                                                      |
| Other materials         | Plant location, non-agri (100km transport distance assumed)                               |
| Process water           | Plant location, non-agri                                                                  |
| Electricity             | Plant location, non-agri                                                                  |
| Thermal energy          | Plant location, non-agri                                                                  |
| Transportation          | Same as the material transported                                                          |
| Waste treatment         | Plant location, non-agri                                                                  |
| Avoided feed production | Same as carbon source location, agri                                                      |

**Table 3** Datasets used, their use in different locations in the study, and the type of AWaRe factors used for each dataset

| Variable                        | Result category | Ecoinvent dataset name (3.7.1 cut-off)                                                                               | Location in the study           | AWaRe factor type |
|---------------------------------|-----------------|----------------------------------------------------------------------------------------------------------------------|---------------------------------|-------------------|
| Glucose                         | Carbon source   | market for glucose, Global (GLO)                                                                                     | All                             | agri              |
| Sucrose                         | Carbon source   | market for sugar, from sugar beet, GLO                                                                               | Germany                         | agri              |
|                                 |                 | market for sugar, from sugarcane, GLO                                                                                | Australia, US, New Zealand (NZ) | agri              |
| Corn steep solids               | Nitrogen source | ethanol production from maize, Rest of World (RoW)                                                                   | All                             | agri              |
| Ammonia                         | Nitrogen source | market for ammonia, anhydrous, liquid, Europe (referred as RER, which ecoinvent uses as the abbreviation for Europe) | Germany                         | non-agri          |
|                                 |                 | market for ammonia, anhydrous, liquid, RoW                                                                           | US, Australia, NZ               | non-agri          |
| Sulfur dioxide, SO <sub>2</sub> | Other materials | market for sulfur dioxide, liquid, RER                                                                               | Germany                         | non-agri          |
|                                 |                 | market for sulfur dioxide, liquid, RoW                                                                               | US, Australia, NZ               | non-agri          |
| Anti-foam agent                 | Other materials | market for chemicals, inorganic                                                                                      | All                             | non-agri          |
| Potassium phosphate             | Other materials | market for sodium phosphate, RoW                                                                                     | All                             | non-agri          |

|                                                      |                         |                                                                                                |                              |                      |
|------------------------------------------------------|-------------------------|------------------------------------------------------------------------------------------------|------------------------------|----------------------|
| Ammonium sulfate                                     | Other materials         | market for ammonium sulfate, RoW<br>market for ammonium sulfate, RER                           | US, Australia, NZ<br>Germany | non-agri<br>non-agri |
| Magnesium sulfate                                    | Other materials         | market for magnesium sulfate, GLO<br>magnesium sulfate production, RER                         | US, Australia, NZ<br>Germany | non-agri<br>non-agri |
| Calcium chloride                                     | Other materials         | market for calcium chloride, RoW<br>market for calcium chloride, RER                           | US, Australia, NZ<br>Germany | non-agri<br>non-agri |
| Sodium hydroxide, NaOH                               | Other materials         | chlor-alkali electrolysis, membrane cell, RER<br>chlor-alkali electrolysis, membrane cell, RoW | Germany<br>US, Australia, NZ | non-agri<br>non-agri |
| Sodium chloride, NaCl                                | Other materials         | market for sodium chloride, powder, GLO                                                        | All                          | non-agri             |
| Sodium phosphate, Na <sub>2</sub> HPO <sub>4</sub>   | Other materials         | market for sodium phosphate, RER<br>market for sodium phosphate, RoW                           | Germany<br>US, Australia, NZ | non-agri<br>non-agri |
| Trisodium phosphate, Na <sub>3</sub> PO <sub>4</sub> | Other materials         | market for trisodium phosphate, GLO                                                            | All                          | non-agri             |
| Water                                                | Process water           | market for tap water, Europe without Switzerland                                               | Germany                      | non-agri             |
|                                                      |                         | market for tap water, RoW                                                                      | US, Australia, NZ            | non-agri             |
|                                                      |                         | market for electricity, high voltage, DE                                                       | Germany                      | non-agri             |
| Electricity                                          | Electricity             | market for electricity, high voltage, AU                                                       | Australia                    | non-agri             |
|                                                      |                         | Market for electricity, high voltage, NZ                                                       | NZ                           | non-agri             |
|                                                      |                         | market for electricity, high voltage, US-SERC                                                  | US                           | non-agri             |
| Steam                                                | Thermal energy          | market for heat, from steam, in chemical industry, RER                                         | Germany                      | non-agri             |
|                                                      |                         | market for heat, from steam, in chemical industry, RoW                                         | US, Australia, NZ            | non-agri             |
|                                                      |                         | market for heat, district or industrial, natural gas                                           | All                          | non-agri             |
| Transport by truck/lorry                             | Transportation          | market for transport, freight, lorry >32 metric ton, EURO6, RER                                | All                          | non-agri             |
| Transport by train                                   | Transportation          | market for transport, freight train, Europe without Switzerland                                | All                          | non-agri             |
| Transport by ship                                    | Transportation          | market for transport, freight, sea, container ship, GLO                                        | All                          | non-agri             |
| Biomass side stream, replacing animal feed           | Avoided feed production | market for protein feed, 100% crude, GLO                                                       | All                          | agri                 |
| Wastewater treatment                                 | Waste treatment         | treatment of wastewater, average, capacity 1E9l/year, Europe without Switzerland               | Germany                      | non-agri             |
| Wastewater treatment                                 | Waste treatment         | treatment of wastewater, average, capacity 1E9l/year, RoW                                      | US, Australia, NZ            | non-agri             |
| Biomass waste stream to composting                   | Waste treatment         | treatment of biowaste, industrial composting, RoW                                              | All                          | non-agri             |

**Table 4** AWaRe factors - Queensland coastline average, collected from the Google Earth layer Aware v1.2 (January 2022)

| <b>FID</b>                          | <b>Agri</b> | <b>Non-agri</b> |
|-------------------------------------|-------------|-----------------|
| 9944                                | 1.3         | 0.9             |
| 9967                                | 5.4         | 3.6             |
| 9902                                | 4.7         | 3.7             |
| 9988                                | 0.3         | 0.4             |
| 9989                                | 10.8        | 10.3            |
| 10007                               | 0.6         | 0.6             |
| 10039                               | 3.5         | 2.3             |
| 10023                               | 4.6         | 3.6             |
| 10069                               | 18.6        | 14.2            |
| 10051                               | 3.2         | 3.3             |
| 10052                               | 8.7         | 6.4             |
| 10070                               | 3           | 3.2             |
| 10086                               | 41.8        | 18.8            |
| 10112                               | 7.8         | 7.1             |
| 10130                               | 39.6        | 18.3            |
| 10150                               | 3.5         | 3.4             |
| 10208                               | 15.9        | 14.3            |
| 10172                               | 13.1        | 11.1            |
| 10173                               |             | 4.1             |
| 10193                               | 2.6         | 2.1             |
| 10174                               |             | 12              |
| 10223                               | 4.8         | 4.3             |
| 10236                               | 2.3         | 2.1             |
| 10254                               | 18.3        | 15.8            |
| 10272                               | 2.3         | 2               |
| 10255                               |             | 9.4             |
| 10273                               |             | 2.3             |
| 10288                               |             | 5.9             |
| 10301                               | 4.6         | 4.5             |
| 10314                               | 4           | 3.3             |
| 10322                               | 6.2         | 4.9             |
| 10333                               | 1.7         | 1.3             |
| 10343                               | 1.3         | 1               |
| 10353                               | 1.8         | 1.3             |
| 10365                               | 1.3         | 1.1             |
| 10375                               | 2.2         | 1.6             |
| <i>Queensland Coastline average</i> | 7.7         | 5.7             |

**Table 5** AWaRe factors - Victoria coastline / Melbourne area average, collected from the Google Earth layer Aware v1.2 (January 2022)

| <b>FID</b>                                       | <b>Agri</b> | <b>Non-agri</b> |
|--------------------------------------------------|-------------|-----------------|
| 10615                                            | 4.4         | 2.8             |
| 10639                                            | 6.3         | 7.2             |
| 10638                                            | 2           | 2               |
| 10640                                            | 2.7         | 2.1             |
| 10616                                            | 1.2         | 0.9             |
| 10659                                            | 2.9         | 2               |
| 10657                                            | 2.9         | 2.5             |
| 10658                                            | 3.2         | 2.5             |
| 10637                                            | 2.8         | 2.1             |
| 10660                                            | 75.4        | 73.8            |
| 10661                                            | 3.5         | 3.2             |
| 10662                                            | 3           | 2.2             |
| 10641                                            | 1.5         | 1.2             |
| 10663                                            | 11.9        | 8.4             |
| 10617                                            | 1.8         | 1.2             |
| <i>Victoria coastline/Melbourne area average</i> | <i>8.4</i>  | <i>7.6</i>      |

**Table 6** AWaRe factors - Alabama average, collected from the Google Earth layer Aware v1.2 (January 2022)

| <b>FID</b>             | <b>Agri</b> | <b>Non-agri</b> |
|------------------------|-------------|-----------------|
| 6902                   | 0.8         | 0.7             |
| 6930                   | 0.7         | 0.6             |
| 6933                   | 0.7         | 0.7             |
| <i>Alabama average</i> | <i>0.7</i>  | <i>0.7</i>      |

**Table 7** AWaRe factors - Louisiana average, collected from the Google Earth layer Aware v1.2 (January 2022)

| <b>FID</b>               | <b>Agri</b> | <b>Non-agri</b> |
|--------------------------|-------------|-----------------|
| 7006                     | 0.2         | 0.2             |
| 6964                     | 0.8         | 0.7             |
| 6965                     | 0.7         | 0.7             |
| 7002                     | 1.1         | 0.9             |
| 6967                     | 1.3         | 1.1             |
| 6966                     | 1.3         | 0.9             |
| 6924                     | 0.6         | 0.8             |
| <i>Louisiana average</i> | <i>0.9</i>  | <i>0.8</i>      |



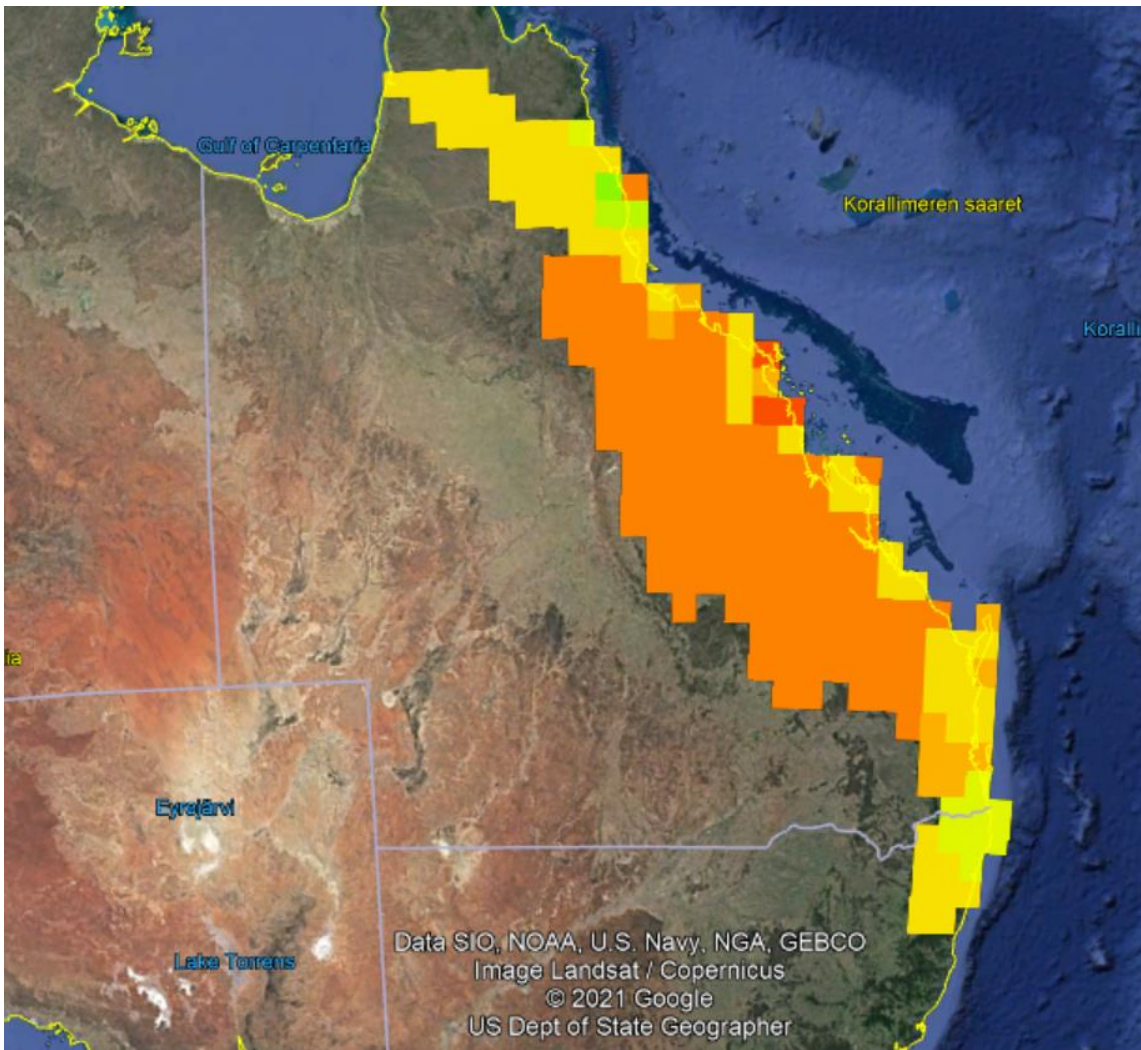

**Fig. 1** Image of the Queensland coastline area that is considered in the AWaRe factors

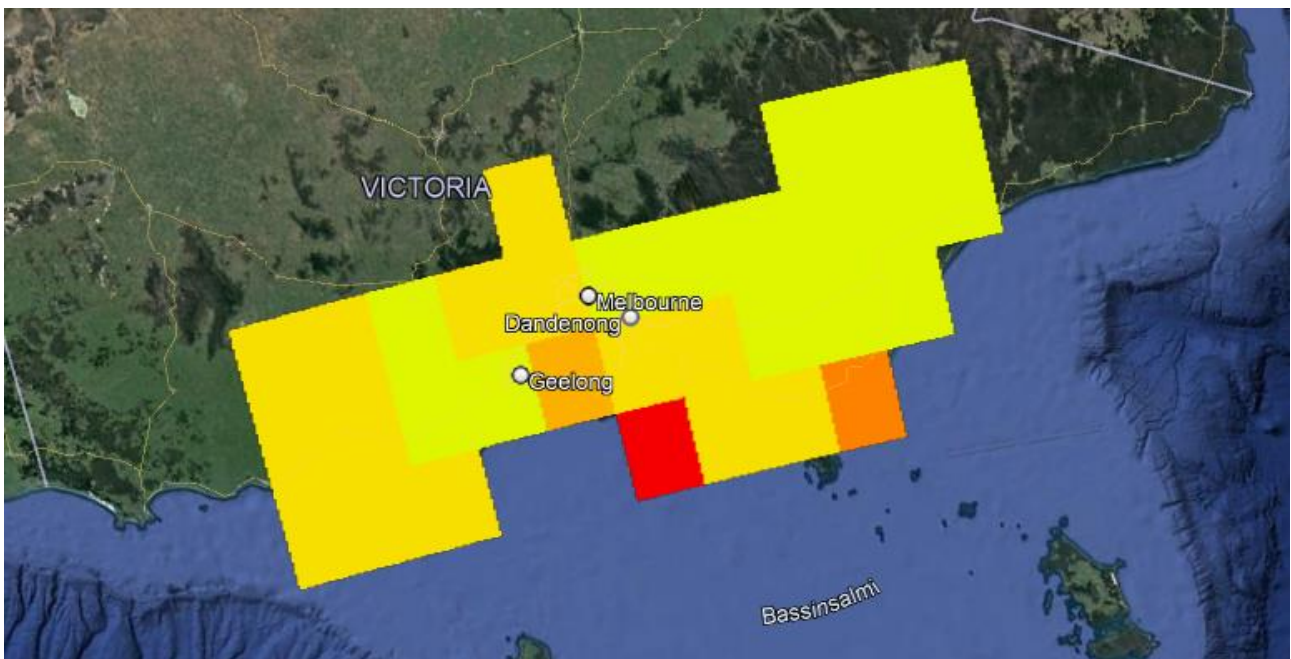

**Fig. 2** Image of the Victoria coastline / Melbourne area that is considered in the AWaRe factors

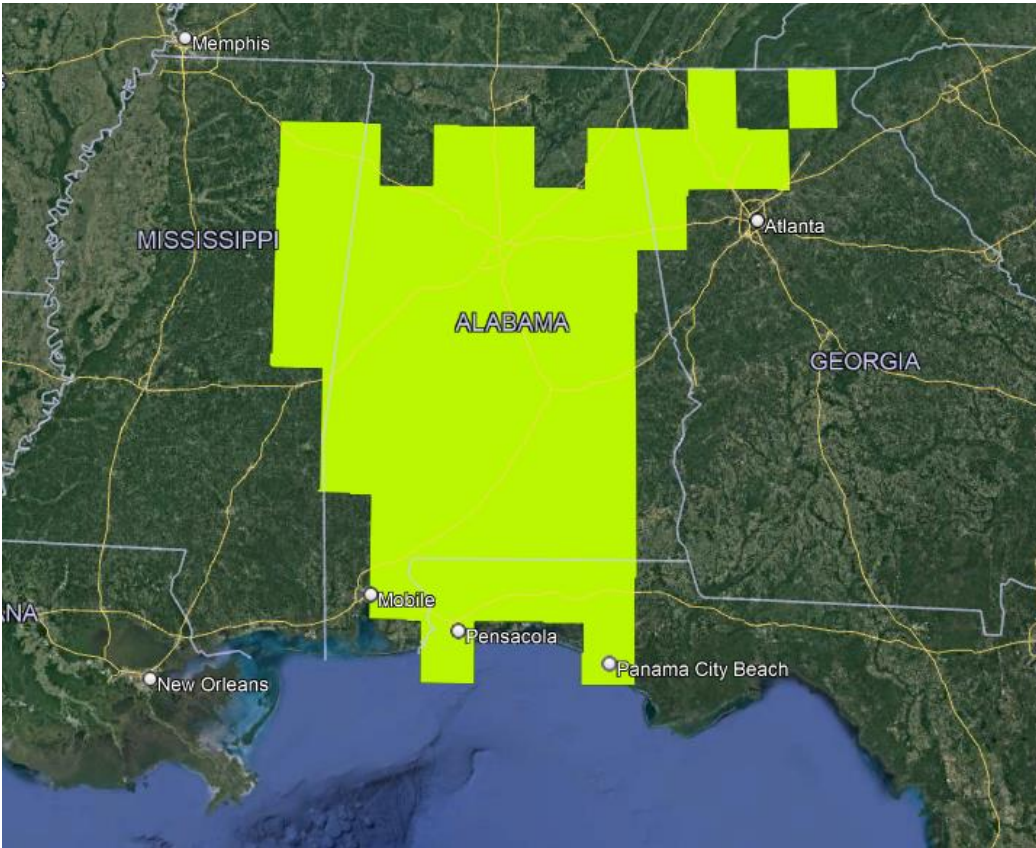

**Fig. 3** Image of the Alabama area that is considered in the AWaRe factors

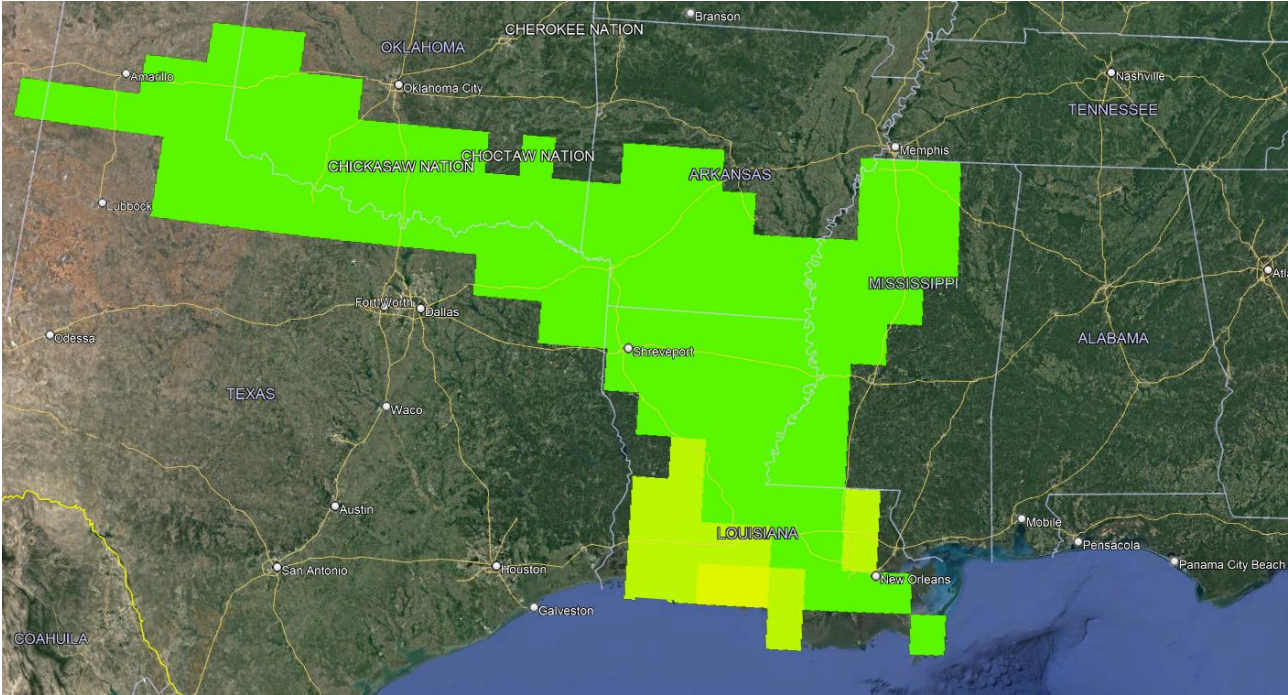

**Fig. 4** Image of the Louisiana area that is considered in the AWaRe factors

### Data 3 Carbon footprint and water scarcity footprint results

The results of carbon footprint and water scarcity footprint presented as numbers in Table 8 and Table 9, respectively.

**Table 8** Carbon footprint results as tonne CO<sub>2e</sub> per tonne of protein

| Scenario number                                | NEW ZEALAND |            |            |            | GERMANY     |            |             |             | US ALABAMA  |            |             |             | AUSTRALIA VICTORIA |             |             |             |
|------------------------------------------------|-------------|------------|------------|------------|-------------|------------|-------------|-------------|-------------|------------|-------------|-------------|--------------------|-------------|-------------|-------------|
|                                                | 1           | 2          | 3          | 4          | 1           | 2          | 3           | 4           | 1           | 2          | 3           | 4           | 1                  | 2           | 3           | 4           |
| Carbon source                                  | 5.35        | 3.65       | 5.35       | 5.76       | 5.35        | 2.13       | 5.35        | 5.76        | 5.35        | 3.65       | 5.35        | 5.76        | 5.35               | 3.65        | 5.35        | 5.76        |
| Nitrogen source                                | 0.92        | 0.92       | 0.92       | 0.99       | 0.76        | 0.76       | 0.76        | 0.82        | 0.92        | 0.92       | 0.92        | 0.99        | 0.92               | 0.92        | 0.92        | 0.99        |
| Other materials                                | 0.18        | 0.18       | 0.18       | 1.71       | 0.16        | 0.16       | 0.16        | 1.55        | 0.18        | 0.18       | 0.18        | 1.71        | 0.18               | 0.18        | 0.18        | 1.71        |
| Process water                                  | 0.03        | 0.03       | 0.03       | 0.19       | 0.01        | 0.01       | 0.01        | 0.06        | 0.03        | 0.03       | 0.03        | 0.19        | 0.03               | 0.03        | 0.03        | 0.19        |
| Electricity                                    | 0.88        | 0.88       | 0.87       | 0.98       | 4.86        | 4.86       | 4.82        | 5.42        | 4.87        | 4.87       | 4.83        | 5.43        | 8.09               | 8.09        | 8.02        | 9.03        |
| Thermal energy                                 | 0.54        | 0.54       | 0.47       | 0.53       | 0.54        | 0.54       | 0.47        | 0.53        | 0.54        | 0.54       | 0.47        | 0.53        | 0.54               | 0.54        | 0.47        | 0.53        |
| Transportation                                 | 0.18        | 0.17       | 0.18       | 0.22       | 0.04        | 0.04       | 0.04        | 0.07        | 0.04        | 0.21       | 0.04        | 0.07        | 0.15               | 0.15        | 0.15        | 0.19        |
| Waste treatment                                | 0.02        | 0.02       | 0.08       | 0.1        | 0.01        | 0.01       | 0.08        | 0.09        | 0.02        | 0.02       | 0.08        | 0.1         | 0.02               | 0.02        | 0.08        | 0.1         |
| Avoided feed production                        | -0.86       | -0.86      | 0          | -0.92      | -0.86       | -0.86      | 0           | -0.92       | -0.86       | -0.86      | 0           | -0.92       | -0.86              | -0.86       | 0           | -0.92       |
| <i>Net impact, t CO<sub>2e</sub>/t protein</i> | <i>7.2</i>  | <i>5.5</i> | <i>8.1</i> | <i>9.6</i> | <i>10.9</i> | <i>7.7</i> | <i>11.7</i> | <i>13.4</i> | <i>11.1</i> | <i>9.6</i> | <i>11.9</i> | <i>13.9</i> | <i>14.4</i>        | <i>12.7</i> | <i>15.2</i> | <i>17.6</i> |

**Table 9** Water scarcity results as m<sup>3</sup> world eq. per ton of protein

| Scenario number                                      | NEW ZEALAND |             |             |            | GERMANY    |            |            |            | US ALABAMA |            |            |            | AUSTRALIA VICTORIA |             |             |             |
|------------------------------------------------------|-------------|-------------|-------------|------------|------------|------------|------------|------------|------------|------------|------------|------------|--------------------|-------------|-------------|-------------|
|                                                      | 1           | 2           | 3           | 4          | 1          | 2          | 3          | 4          | 1          | 2          | 3          | 4          | 1                  | 2           | 3           | 4           |
| Carbon source                                        | 926         | 5033        | 926         | 997        | 213        | 311        | 213        | 229        | 88         | 558        | 88         | 95         | 926                | 5033        | 926         | 997         |
| Nitrogen source                                      | 27          | 27          | 27          | 30         | 18         | 18         | 18         | 19         | 11         | 11         | 11         | 12         | 122                | 122         | 122         | 132         |
| Other materials                                      | 11          | 11          | 11          | 67         | 7          | 7          | 7          | 46         | 4          | 4          | 4          | 27         | 49                 | 49          | 49          | 304         |
| Process water                                        | 53          | 53          | 53          | 313        | 35         | 35         | 35         | 205        | 21         | 21         | 21         | 124        | 240                | 240         | 240         | 1409        |
| Electricity                                          | 4           | 4           | 4           | 4          | 34         | 34         | 34         | 38         | 15         | 15         | 15         | 17         | 123                | 123         | 121         | 137         |
| Thermal energy                                       | 1           | 1           | 1           | 1          | 1          | 1          | 1          | 1          | 0          | 0          | 0          | 0          | 6                  | 6           | 5           | 5           |
| Transportation                                       | 0           | 0           | 0           | 0          | 0          | 0          | 0          | 0          | 0          | 0          | 0          | 0          | 1                  | 1           | 1           | 1           |
| Waste treatment                                      | 0           | 0           | 0           | 0          | 0          | 0          | 0          | 0          | 0          | 0          | 0          | 0          | 0                  | 0           | 0           | -1          |
| Avoided feed production                              | -542        | -542        | 0           | -583       | -125       | -125       | 0          | -134       | -51        | -51        | 0          | -55        | -542               | -542        | 0           | -583        |
| <i>Net impact, m<sup>3</sup> world eq./t protein</i> | <i>481</i>  | <i>4587</i> | <i>1022</i> | <i>829</i> | <i>183</i> | <i>281</i> | <i>307</i> | <i>404</i> | <i>88</i>  | <i>558</i> | <i>140</i> | <i>219</i> | <i>924</i>         | <i>5031</i> | <i>1464</i> | <i>2401</i> |
